# Supplementary material for: A Livestock Trampling Function for Potential Emission Rate of Wind-blown Dust in a Mongolian Temperate Grassland
Source: Copernicus journal article supplement (doi:10.5194/acp-2017-94), 2017-02-17
Supplement: Supplementary file [file acp-2017-94-AC2-supplement.pdf]

# ~~A~~ ~~An Anthropogenic Dust Emissions due to Livestock Trampling~~ ~~Function for Potential Emission Rate of Wind-blown Dust in a~~ Mongolian Temperate Grassland

Erdenebayar Munkhtsetseg<sup>1</sup>, Masato Shinoda<sup>2</sup>, Masahide Ishizuka<sup>3</sup>, Masao Mikami<sup>4</sup>, Reiji Kimura<sup>5</sup>, and George Nikolich<sup>6</sup>

<sup>1</sup>School of Applied Sciences and Engineering, National University of Mongolia, Ulaanbaatar, Mongolia

<sup>2</sup>Graduate School of Environmental Studies, Nagoya University, Nagoya, Japan

<sup>3</sup>Kagawa University, Takamatsu, Japan

<sup>4</sup>Meteorological Research Institute, Tsukuba, Japan

<sup>5</sup>Arid Land Research Center, Tottori University, Tottori, Japan

<sup>6</sup>Desert Research Institute, Nevada University, Las Vegas, USA

Correspondence to: E.Munkhtsetseg (munkhtsetseg.e@seas.num.edu.mn)

**Abstract.** Mongolian Grasslands is one of the natural dust source regions and it contributes to anthropogenic dust due to its long tradition of raising livestock. ~~Decades~~ Past decades of abrupt changes in a nomadic society necessitate a study on effects of livestock trampling on dust emissions, so that research studies may help maintain sustainable ecosystem and well-conditioned atmospheric environment. ~~For scaling the effect strength of trampling, therefore~~ In this study, we conducted a mini-wind tunnel experiment (by PI-SWERL<sup>®</sup> device) to measure dust emission fluxes from trampling (at 3 disturbance levels of livestock density,  $N$ ) and zero trampling (natural as the background level) at test areas in a Mongolian temperate grassland. Moreover, we scaled an anthropogenic dust emission by natural dust emission as a relative consequence of livestock trampling. We found the substantial increase in dust emissions due to the livestock trampling. This positive effect of trampling on dust emissions was persistent throughout all wind friction velocities,  $u_*$  (varying from 0.44 to 0.82  $\text{ms}^{-1}$ ). Significantly higher dust loading had occurred after a certain disturbance level has reached by the livestock trampling. Our result suggests that both friction velocity ( $u_*$ ) and disturbance level of livestock density ( $N$ ) has enormous combinational effect on dust emission from trampling test surface. ~~Furthermore, we successfully developed a livestock trampling function dependant on  $u_*$  and  $N$ . In the livestock trampling function, almost 4 times greater of determinant power for  $u_*$  than of for  $N$  was determined ( $f_L(N, u_*) \sim N^{1.1} u_*^4$ ).~~ It points It means that the effect ~~strength of trampling get magnified with an increase in  $u_*$ , and, therefore dust will emit much as~~ stronger wind prevails at the trampled surfaces. This finding indicates that the effect of trampling of livestock trampling on dust emission can be seen or get into a play ~~in emission~~ when wind is strong. It emphasizes that a better management for livestock allocation coupled with strategies to prevent anthropogenic dust loads is needed, however, there are many uncertainties and assumptions to be improved in this study. ~~The applicability of our result is feasible with a care to other areas beyond the study location.~~

20 Keywords: *surface disturbance; anthropogenic dust; PI-SWERL<sup>®</sup> mini wind tunnel; livestock density; Cobb-Douglas formula; friction velocity*

## 1 Introduction

Mongolian Grasslands is one of the natural dust source regions and it contributes to anthropogenic dust due to its long tradition of raising livestock. Mongolian ecosystem is generally sensitive to any external disturbance of the environment, natural or human, such as climate change or human activities (Peters, 2002; Pogue and Schnell, 2001). The projected increasing aridity warns that enhanced warming (climate change) coupled with rapidly increasing human activities will further exacerbate the risk of land degradation and desertification in the near future in the drylands (Huang et al., 2016). Specifically, the major source regions of Asian dust has expanded from northwestern China to the Gobi Desert in Inner Mongolia (Wang et al., 2008; Fu et al., 2008). Livestock population has been increased substantially in the past decades (25 ml. in 1990, 30 ml. in 2000, 61 ml. in 2016) and it is projected to persist into the future (Shabb et al., 2013). Natural grassland exposures to livestock trampling, overgrazing and road vehicle traffic are some of the most prevalent modifiable risk factors for dust emissions in Mongolia. Animal husbandry will contribute to atmospheric dust loading through degraded and disturbed land by i) grazing pressure and ii) livestock trampling (trampling pressure). ~~In water and nutrient-limited environments, increased grazing is expected to increase plant mortality and ultimately decrease species richness (Huston and Huston, 1994; Proulx and Mazumder, 1998). The effect of grazing on land degradation that manifested with the declined plant species composition, low productivity and poor soil fertility (Steffens et al., 2008; Li et al., 2009) is well established, and evidence that these outcomes are more severe in areas close to urban settlements and water resources (e.g., Mandakh et al., 2007; Wang et al., 2013; Hilker et al., 2014; Fujita et al., 2013; Bat-Oyun et al., 2015). This-~~

The grazing pressure has been linked to increased number of dust events through elevated erodibility of land surface declined vegetation cover (Kurosaki et al., 2011) and altered areas in land cover types (Wang et al., 2008; Fu et al., 2008; Huang et al., 2015). Most studies assessed anthropogenic dust based on A such change in land cover data (Tegen et al., 2004; Huang et al., 2014). So that dust loads from grazing pressure has been included in the is mostly used to assess anthropogenic dust (Tegen et al., 2004; Huang et al., 2015). However, large uncertainties in the assessment of total anthropogenic dust, semi/directly, however, there still remain large uncertainties is still remained (Tegen et al., 2004; Ginoux et al., 2012; Huang et al., 2014). Thus, it is crucial to investigate the effects of livestock trampling on (anthropogenic) dust emissions.

~~It has been long stated that dust models require land surface parameterizations to improve their prediction performances (Shao, 2000; Marticorena and Bergametti, 1995; Uno et al., 2006; Lee et al., 2013). Underestimating effect of animal trappings on the dust emission might be hindered research community to predicting dust precisely, particularly for intensive grazed dust sources. Although we have known for some time that livestock trampling is also important factor in anthropogenic dust, our knowledge of the magnitude of the relation, both for total dust loads and for dust loads from anthropogenic activities, and the land disturbance of trampling pressure in terms of total atmospheric dust from grasslands is limited.~~ Previous studies have shown associations between impacts of mechanical disturbance on soil particle bonds (Hoffmann et al., 2008; Steffens et al., 2008) and dust emission strength (Neuman et al., 2009; Houser and Nickling, 2001; Baddock et al., 2011; Macpherson et al., 2008; Belnap and Gillette, 1997; Belnap et al., 2007) they revealed a common consequence of an increased dust emissions. ~~However, areas of interest in such studies have been selected consistently to be the playa, where surface stability is considered to be a critical~~

control in dust emission dynamics of dry lakes. Aside from physical crusts of playas, disturbance has also been investigated for the erodibility of biologically crusted desert soils with field wind tunnels (e.g., Belnap and Gillette, 1997; Belnap et al., 2007). In such experiments, the simulation of disturbance often involves an artificial agent, and although both are effective in disrupting consolidated surfaces and offering straightforward replication, quantifying the effect of a natural process of disturbance should also be of significant interest for understanding wind erosion. Very few studies focused on natural disturbance effects such as livestock trampling for dust emissions which produced limited data (Houser and Nickling, 2001; Baddock et al., 2011; Macpherson et al., 2008). Scarce and inconsistent data prevents scientists to parameterize the disturbance effects on dust emissions and to scale its relative contribution to the atmospheric dust. The lack of consistency is attributable to the limited number of studies, the limited range and variable categorization of land disturbance and dust flux among studies, and possibly real differences between the effects of land disturbance on the dust emissions from some land-surface parameters.

Given above background, we aimed to reveal effect of investigate effects of livestock trampling on dust emission processes, in a quantitative manner. For scaling the effect strength of trampling, therefore, rate, and scale an anthropogenic dust emission by natural dust emission as a relative consequence of livestock trampling. Therefore, we conducted a mini-wind tunnel experiment (by PI-SWERL<sup>®</sup> device) to measure dust emission fluxes from trampling and zero trampling test areas. For achieving study aim, we purposed (1) to investigate effect of livestock trampling on dust emissions (2) to develop a livestock trampling function for emission rate, and (3) to examine the reliability of the trampling function and its applicability for assessing anthropogenic dust. Successfully introduced livestock trampling function will be useful to quantify an emission rate from trampling areas; and further, it might provide an insight into the possible assessment of anthropogenic dust for grazing areas (at 3 disturbance levels of livestock density,  $N$ ) and zero trampling (natural as the background level) at test areas in a Mongolian temperate grassland. It should be mentioned that, our dust data represents the potential dust emission, as a restriction of wind tunnel measurements. PI-SWERL<sup>®</sup> mini wind tunnel was successfully being used on playa surfaces to produce potential erodibility estimates (Etyemezian et al., 2007) that validated using conventional wind tunnel data Sweeney et al., 2008. This PI-SWERL<sup>®</sup> was also successfully used to investigate dust emission on surfaces in the Mongolian temperate steppe grassland (Munkhtsetseg et al., 2016).

## 2 Study materials

### 2.1 A study site description

Mongolian grasslands occupy over 80% of its total territory (equal to 113.1 ml. hectare). According to FAO 2010, as much as one-third of total pastures is under utilized. Most unused land is far from administrative centers and many herders are increasingly loath to travel that far, especially when infrastructure is deficient. Every year new wells operates, but huge number of wells still remains out of operation, resulting 10.7 ml. hectare of pasture that cannot be used because of lack of water (Suttie et al., 2005). According to spatial density of livestock in Mongolia (Saizen et al., 2010), the largest number density of livestock is located on the Mongolian steppe grassland. The impact of grazing on plant diversity varies across environmental gradients of precipitation and soil fertility (Milchunas et al., 1988). In the desert-steppe zone, species richness was lower in the drier

years but did not vary with grazing pressure. In the steppe zone, species richness varied significantly with grazing pressure but did not vary between years. species richness is not impacted by grazing gradient in desert steppe, but it is in the steppe (Cheng et al., 2011). Consequently, the Mongolian steppe has been impacted the most by the grazing and trampling.

Our study was carried out in Bayan-Unjuul (sum center) located in a temperate Mongolian steppe (Fig. 1a; 47°02'38.5"N, 105°56'55"E). Nomads and settlements of this sum have raised a large number of livestock, and they rank at number 30 out of 329 sums (Saizen et al., 2010). Last decade, number of dust events associated with wind erodibility has increased by 30% in Bayan-Onjuul (Kurosaki et al., 2011). This is an area where dust emission activity has been monitored on a long-term basis (Shinoda et al., 2010a) at a dust observation site (DOS) adjacent to the study site (Fig. 1a). According to long-term meteorological observations made at the Institute of Meteorology and Hydrology of Mongolia's (IMH) monitoring station located near the site, the prevailing wind direction is northwest. Mean annual precipitation is 163 mm, and mean temperature is 0.1°C for the period 1995 to 2005 (Shinoda et al., 2010b). Soil texture is dominated by sand (98.1% , with only 1.3% clay, and 0.6% silt (Table 1; Shinoda et al. (2010a)).

## 2.2 Wind tunnel experiment

### 2.2.1 PI-SWERL<sup>®</sup> mini wind tunnel

The PI-SWERL<sup>®</sup> consists of a computer-controlled 24-volt DC motor attached to the top of an open-bottomed cylindrical chamber 0.20 m high and 0.30 m in diameter (Figure 1b). Inside the chamber there is a flat annular ring (width = 0.06 m) with an outer diameter of 0.25 m, which is positioned 0.05 m above the soil surface (Figure 1b). As the annular ring revolves about its center axis, a velocity gradient forms between the flat bottom of the ring and the ground creating a shear stress  $\text{Nm}^{-2}$  on the surface (Etyemezian et al., 2007). Dust and sand are mobilized by the shear stress generated by the rotating ring. Dust concentration ( $PM_{10}$ ) within the chamber that encloses the annular ring is measured by a nephelometer-style instrument, the 8520 DustTrak (TSI, Inc., Shoreview MN). The PI-SWERL<sup>®</sup> tests measure the potential fugitive PM10 dust emissions from the surface at different friction velocity  $u_*$  ( $\text{ms}^{-1}$ ) corresponding at the high end to a wind speed of approximately  $30 \text{ ms}^{-1}$  at 2 m above ground level (AGL). In this experiment, the rotation per minutespeed RPM (in rpm) of the annular ring was converted correlated to with a corresponding (in  $\text{ms}^{-1}$ ) friction velocity. The measured data by the PI-SWERL<sup>®</sup> instrument were analyzed using the miniature PI-SWERL<sup>®</sup> user's manual (version 4.2) (DUST-QUANT, 2009). Each PI-SWERL<sup>®</sup> experiment consisted of friction velocities vary from  $0.16$  to  $0.82 \text{ ms}^{-1}$ . Depending on the different friction velocity, six levels are identified ( $i = 1, 6$ ) within each PI-SWERL experiment. Four levels include two gradual increases in  $u_*$   $0.54, 0.73 \text{ ms}^{-1}$  (ramp properties) separated by three constant  $u_*$  settings of  $0.44, 0.64, \text{ and } 0.82 \text{ ms}^{-1}$  (step properties) dust emission flux was used (Fig. 2c). When performing the dust measurements by PI-SWERL<sup>®</sup>, we avoided duplicating measurements on the same location by shifting its position each time.

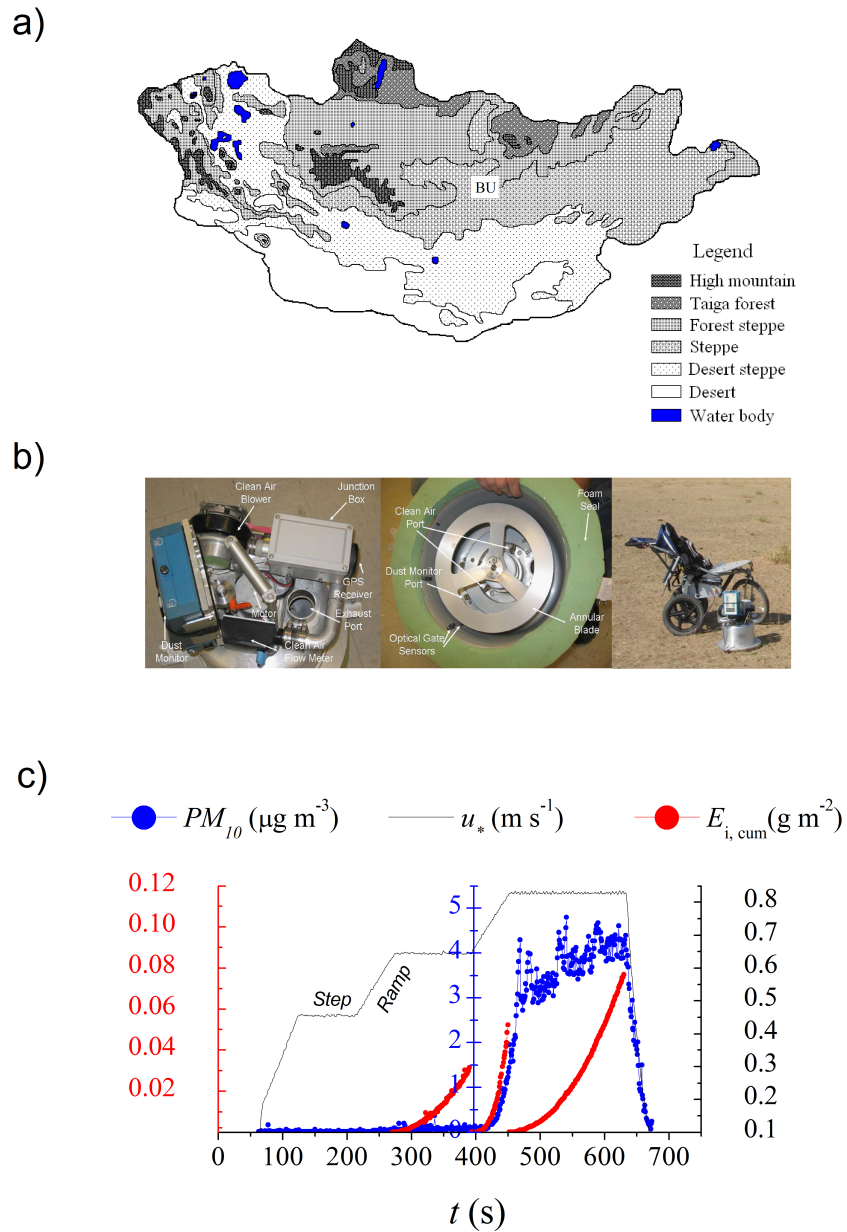

**Figure 1.** (a) BU (Bayan-Unjuul) denotes the location of the study site in with respect with to vegetation zones in Mongolia; (b) Pictorial illustrations of PI-SWERL<sup>®</sup>, top view at on the left, bottom view in the middle, and in the field situation at on the right sides; (c) An example data trace of  $PM_{10}$  concentration and the cumulative dust emission ( $E_{i, cum}$ ) associated with friction velocity ( $u_*$ ) during PI-SWERL<sup>®</sup> measurement period (t).

## 2.2.2 Experimental area setting

While grazing, livestock leaves behind its trampling trace; therefore, we schemed a trampling route based on grazing route (Fig.2a). Many studies proved that livestock density (i.e., grazing pressure) is usually highest close to water sources or settlements and decreases with distance away from such localities (ANDREW and LANGE, 1986; Fernandez-Gimenez and Allen-Diaz, 2001; Landsberg et al., 2003; Sasaki et al., 2008; Cheng et al., 2011). According to (Stumpp et al., 2005) the livestock spatial densities were higher in the first 300 m of the transects from the local centers. This finding of the heavy grazing with a 'radial gradient' was also found at our study site (Cheng et al., 2011), which spots a trampling-active area. The trampling-active area (with 300 m transect) close to local centers is reasonable from the view point of livestock trampling routes as well. Three types of pictorial livestock trampling routes could be illustrated based on published result (Suttie et al., 2005) on a seasonal and spatial variability of trampling density in reference to grazing habits in seasons and animal types (Fig.2a). Type I, a long grazing route, draws summer and autumn pasture is usually grazed in common, with few problems of access or dispute. Type II, a short grazing route, draws the winter and spring camps and grazing are the key to the herders overall system; (at a season when feed is very scarce) each must provide shelter as well as accessible forage through that difficult season (Fig.2a). Type III, a distanced grazing route, draws taking livestock to more distant fattening pastures (*otor*) is an important part of well organized herding and, if done with skill, can greatly improve the condition of stock before the long winter. Horses and cattle may be left to graze, except those being milked. So, measuring dust emissions at the area close to the local center will reflect on the trampling activity.

Our study aimed to measure dust emission affected only by livestock trampling versus no-trampling. Therefore, we focused to do PI-SWERL<sup>®</sup> mini wind tunnel experiment under similar weather and surface aeolian conditions at the trampled and no-trampled areas. Performing PI-SWERL<sup>®</sup> mini wind experiment for a short period of time will enable us to avoid weather changes. Experimental test area of livestock trampling was selected to be close to the no-trampling area where both areas are subjected to similar surface aeolian condition. Hence, at foremost, trampling active area at our site was presented by annulus area enclosed by inner and outer circles (Fig.2b). Inner circle excludes a residential area where land is disturbed mainly by local people's daily activities, while outer circle delimits trampling activity of 300 m from the local (outer) center. The residential area was defined with a radius starting from the BU sum center to the most distanced object. It is well known that sand and dust particles transported by wind likely to deposits on downwind lee, when distracted by rough objects like vegetation, shelter areas or buildings. This condition results a distinct fractions of sand and dust on land surface, which will produce a differential dust emissions. As mentioned above, the prevailing wind direction (*NW* at our site) will differentiate potent emission into upwind and downwind areas. In order to avoid or reduce a possible source of data uncertainty by of the aeolian processes at the site, we narrowed our area of interest into the upwind area of the trampling active area. Further, regarding all possible requirements, the transect line shown in Figure 2c was mandatory to run PI-SWERL experiment.

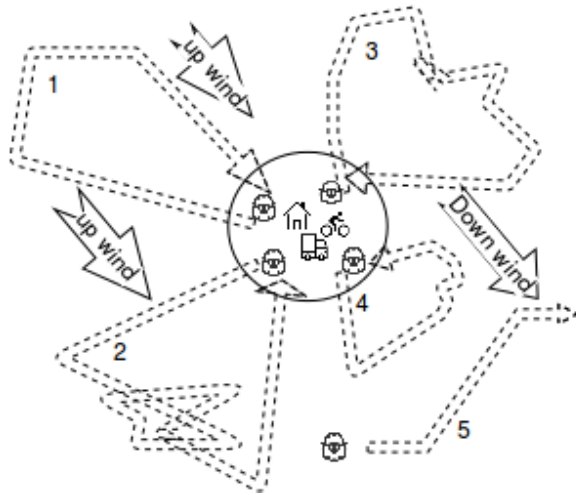

2a.png

(a) A schematic drawing of grazing route around administrative center (or well). Livestock will graze on daily routine depending on weather and fodder source. Type I route (marked by 1, 2, and 3) usually happens good weather condition with rich fodder; Type II route (marked by 4) happens during bad weather condition, like spring and winter; Type III route (marked by 5) is called *otor*.

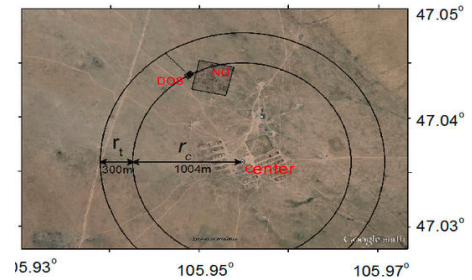

(b) Annulus area selected for this study.  $r_c$  is the distance from sum center (*Center*) to the inner circle for the selected annulus area and  $r_t$  is the width of annulus area

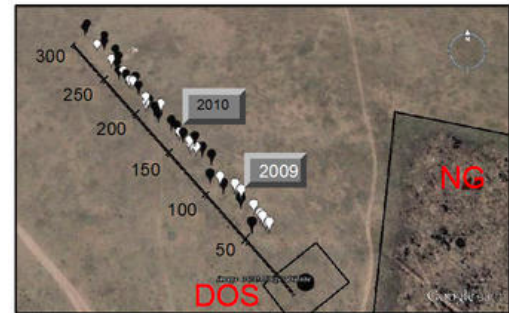

(c) PI-SWERL<sup>®</sup> experimental test areas (transect lines; and Dust Observation Site (*DOS*)). White and dark balloons presents dust sampling points along the transect in 2009 and 2010.

**Figure 2.** Experimental settings

### 2.2.3 Experimental conditions of land surface

#### Analogous conditions of vegetation and soil moisture

The vegetation and pebble survey was defined along the transect distanced at 50, 150, 200, and 300 m away from the DOS within a 1 m × 1 m plot (Table 1) (Munkhtsetseg et al., 2016). In the two springs of 2009 and 2010, vegetation conditions were similar. Vegetation covers were 2.4 and 2.3 percentages during the measurement periods in 2009 and 2010, respectively. These seasonal conditions resulted in sparse vegetation growth and exposed large portions of the surface area to be free of vegetation. This open area enabled us to run PI-SWERL<sup>®</sup> wind tunnel which has a limitation in- measuring dust emissions over a vegetated area where vegetation height is above 4cm. Sparse vegetation growth during the measurement periods and a small size of PI-SWERL<sup>®</sup> (an effective area of 0.026 m<sup>2</sup>) enabled us plenty of bare surfaces to conduct PI-SWERL<sup>®</sup> measurements. Therefore, our dust measurements by PI-SWERL<sup>®</sup> were not influenced by vegetation roughness. Recent study revealed that soil moisture has a clear seasonal variation in Mongolia with the lowest value in the spring times (Nandintsetseg and Shin-

oda, 2015). Consequently, the spring is recognized as a dust favorable season due to its low seasonal precipitation (Shinoda et al., 2011). Averaged soil moisture values were 0.0022 and 0.0024  $gg^{-1}$  in 2009 and 2010, respectively. Soil moisture values

**Table 1.** Land surface and soil size characteristics in the study area

|      | Pebble cover (%) |                  | Soil texture fraction <sup>1</sup> (10 cm depth) (%) |                  |         | Vegetation cover <sup>2</sup> (%) |         | Soil moisture <sup>2</sup> ( $gg^{-1}$ ) |  |
|------|------------------|------------------|------------------------------------------------------|------------------|---------|-----------------------------------|---------|------------------------------------------|--|
|      | (<30 mm)         | Clay (<0.002 mm) | Silt (0.002-0.02 mm)                                 | Sand (0.02-2 mm) | in 2009 | in 2010                           | in 2009 | in 2010                                  |  |
| Mean | 2.4              | 1.3              | 0.6                                                  | 98.1             | 2.4     | 2.3                               | 0.0022  | 0.0024                                   |  |
| SD   | 0.18             | 0.1              | 0.1                                                  | 0.1              | 0.3     | 0.2                               | 0.0001  | 0.00012                                  |  |

<sup>1</sup> is defined in Shinoda et al. (2010a); <sup>2</sup> is presented in Munkhtsetseg et al. (2016)

showed a subtle change in standard deviations of soil moisture. Consequently, these standard deviations revealed insignificant changes in soil moisture among the transect lines for each year. As a temporal variation between the 2-year study period, the difference in averaged soil moisture values on these two springs was equal to 0.0002  $gg^{-1}$ , which is insignificant amount that can alter amount of dust emissions (Fécan et al., 1998). These climatic conditions and above mentioned experimental settings clearly indicate that both soil moisture and vegetation conditions were not influential factors in altering dust emissions from bare, non-trampled and systematically trampled surfaces in 2010; and the naturally trampled surfaces in 2009 and 2010.

## 10 Livestock trampling density

The total numbers of livestock at bag-scale for Bayan-Onjuul subdistrict were counted as 52378 and 43709 for 2009 and 2010, respectively (National statistical Organization reports, 2009; 2010). We calculated livestock densities in the annulus area (Fig. 2b) for a given year, as presented in Eq.(1):

$$N = \frac{10^4 num}{\pi(r_c + r_t)^2 - \pi r_c^2} \quad (1)$$

15 where  $N$  is livestock density in head per hectare (and per a year ( $Headha^{-1}yr^{-1}$ , and refer to  $Headha^{-1}$ );  $num$  is total livestock in a head;  $r_c$  (=1004) is the radius distance from the center to the transect start-line in meter;  $r_t$  (=300) is the transect line in meter;  $10^4$  is a unit conversion of square meter to hectare (Fig. 2c). Total livestock in a head is the total number of 5 animals: sheep, goat, camel, cattle, and horse that are traditionally herded by the nomads. The calculated livestock densities were 241 and 201  $Headha^{-1}$  along transect lines in 2009 and 2010, respectively.

20 As for trampling inside DOS fenced area, a calculation of livestock density was followed a basic procedure. A total fenced area of DOS was 50 m x 35 m. Inside DOS fence, sheep movement was constrained into a subarea of 8 m x 35 m to ensure that allocated meteorological equipments would not be damaged. Livestock density inside DOS, therefore, calculated as a spatial distribution total sheep to the enclosed area of 8 m x 35 m, and it estimated as 250  $Headha^{-1}$ .

We assumed that all types of livestock (small and large ruminants) has the same effect on land surface trampling, irrespective of the size or distribution of the footprints. In addition, we made no distinction between the weights of the different livestock



species. However, the potential variability due to the difference in weights warrants further investigation. (Xu, 2014) tested the quantity of dust emitted from vehicles and found that it varied with the weight of the vehicles.

## 2.2.4 Field experiment

5 Figure 3 presents experimental details including experimental plots, measurement replications and associated livestock density ( $N$ ). Inside the DOS, where is no-trampling area ( $N=0$ ), we collected 7 replicative dust data on 16 May, 2010. At the same day, we collected 4 replicative dust data after 5 hours of grazing of 7 sheep ( $N_{250}$ ), those herded into inside the DOS (Figure 3a). We collected 21 replicative dust data along the naturally trampled transect line (shown Fig. 2c) with  $N$  of 241 Head $ha^{-1}$  ( $N_{241}$ ) on 15 May 2009. On following winter, livestock density at our study site was reduced due to the moderate dzud (Mongolian word indicating harsh winter conditions contributes to livestock mortality) (Natsagdorj and Dulamsuren, 2001; Begzsuren et al., 2004). We collected 25 replicative dust data along the naturally trampled transect line with  $N$  of 201 Head $ha^{-1}$  ( $N_{201}$ ) on 15 May, 2010 (Fig. 3b).

All dust emission data was obtained by the PI-SWERL<sup>®</sup> mini mind tunnel. For producing replicatve data, we avoided to run PI-SWERL experiment on the same spot by shifting to the other area. Additionally, we tried to perform all PI-SWERL<sup>®</sup> measurements at the same day to obtain unbiased data by weather changes from day to day. Since April 2008, DOS was fenced to keep out livestock; no any livestock trampling for a 2 year-period. These measured dust fluxes, on bare surfaces inside DOS (fenced to keep livestock out) was considered as a reference dust for non-trampled surfaces ( $F_{REF}$ ).

Moreover, livestock trampling intensities for all 3 types of measurements was likely subject to on annual basis. Because, dust

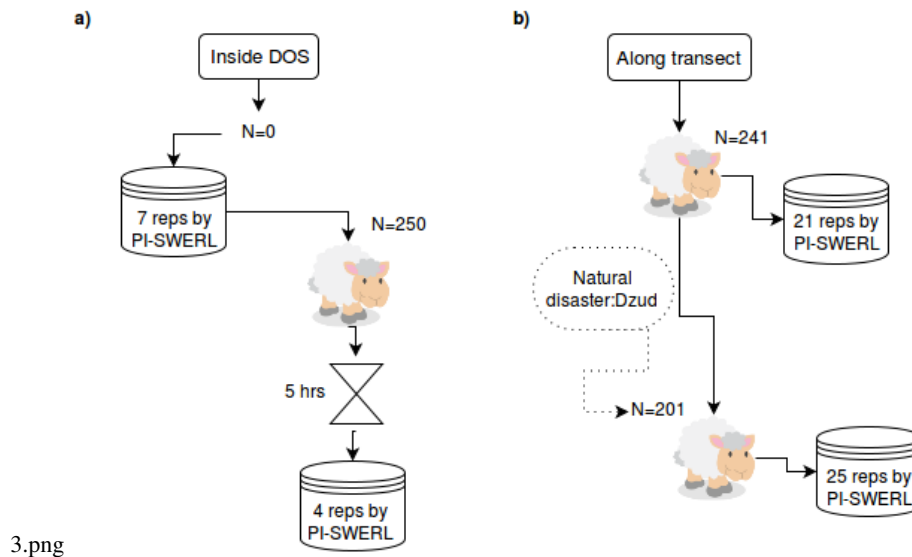

**Figure 3.** A schematic flowchart of PI-SWERL<sup>®</sup> experimental test a) for zero and trampling of  $N_{250}$  inside *DOS*; and b) for trampling of  $N_{201}$  and  $N_{241}$  along transect areas. PI-SWERL<sup>®</sup> experimental replications for each dataset is marked as *reps*.

emissions at the naturally trampled transect were measured on annual basis (at the springs 2009 and 2010). As for dust for  $N=250 \text{ Headha}^{-1}$ , 5 hour of grazing is also annual if we consider that average walking speed for livestock is  $314 \text{ mh}^{-1}$  (equal to approximately within 11.5 s time-period covers a 1 m path) (Plachter and Hampicke, 2010). Assuming that the livestock pass 4 times (from sum center to grazing area and vice versa) along the transect lines of the ring area in a day, this will result in a yield of 1460 times passages per a year. On annual basis, livestock walk over and over a 1 meter path for a time period of 4.6 h ( $11.5 \text{ s} \times 1460 \text{ times}=16790 \text{ s}$ ). This finding can be used to estimate an average time period of livestock trampling in the fence. Due to limited space, the livestock inside the fence was in a near static movement by not walking the path. This condition enabled us to assume that each sheep stands in the static state covering around 1 m path with respect to their body size. Thereafter livestock trampling continued for a half day ( $\approx 5 \text{ h}$ ) on bare surfaces inside DOS, after which systematic trampled dust emissions measurements were conducted by the PI-SWERL<sup>®</sup> instrument.

### 3 Study methods Data analysis

#### 3.1 Anthropogenic dust induced by trampling Mean values of livestock dust emissions

In this study, anthropogenic dust emission flux,  $F_N$ , is considered two main assumptions. These two main assumptions are: 1) dust amount will be larger at the livestock trampling test areas than at the zero trampling surfaces ( $F_N \geq F_{REF}$ ); 2) increased dust amount will be subject to a trampling function,  $f_L(N, u_*)$ . Therefore, our dust flux formula was expressed as shown in Eq.:

$$F_N = F_{REF}(1 + f_L(N, u_*))$$

where  $F_N$  and  $F_{REF}$  are dust emissions from test areas of trampling and zero trampling, respectively (). In equation,  $F_{REF}$  is included for a quantity term only, whereas  $f_L(N, u_*)$  is referred to a physical term for defining  $F_N$ .

#### 3.2 A formula of livestock trampling function for dust emission

On a physical basis, livestock trampling weakens soil particle bonds to result an ease dust inputs released by wind blows ( $u_*$ ) into the atmosphere (Baddock et al., 2011; Maepherson et al., 2008). Surface disturbance does not directly cause dust emission but it does recover surface available dust (Zhang et al., 2016). It suggests that a formula of livestock trampling function  $f_L(N, u_*)$  should be derived by livestock density (effect of trampling) and  $u_*$  (wind blown dust). Moreover,  $f_L(N, u_*)$  should be a dust product (of  $N$  and  $u_*$ ) to reflect the physical term of  $F_N$ . Thus, we employed the Cobb-Douglas function for defining our livestock trampling formula. The Cobb-Douglas function is widely used in economics to show the relationship between input factors and the level of total production,  $Y$ , as presented in Eq.:

$$Y = AL^\beta K^\alpha$$

where,  $A$  is total factor productivity,  $L$  is labor input,  $K$  is capital input;  $\alpha$  and  $\beta$  are the measures the responsiveness of output to a change in levels of either  $L$  or  $K$  used in production,  $Y$ . If  $\alpha + \beta = 1$ , the production function has constant returns to

scale, meaning that doubling the usage of capital  $K$  and labor  $L$  will also double output  $Y$ . If  $\alpha + \beta < 1$ , returns to scale are decreasing, and if  $\alpha + \beta > 1$ , returns to scale are increasing. In last decades, this function has been widely used in environmental studies, such as, to show the relationship between human population as a capital input and pollutant emissions as a labor inputs, to output activities to economic growth etc (Labini, 1995; Dong et al., 2013; Cheng et al., 2015). Similarly to this, we employed Cobb-Douglas function to define a formula of  $f_L(N, u_*)$  as a product of  $N$  and  $u_*$  considering trampling increases the weak-bonded dust particles by a labor of livestock density, (as  $L$ , labor), and these dust particles are carried away by wind,  $u_*$  (as  $K$ , capital). If we replace our inputs in eq., the formula of  $f_L(N, u_*)$  will be defined as eq.:

$$f_L(N, u_*) = AN^\beta u_*^\alpha$$

where,  $N$  is livestock density. Generally, transported sediments are sheltered and trapped by surface roughness elements including surface relief, vegetation and marmot mounts etc. It results an unevenly distributed sediment within a local site by producing limited or unlimited sediment supply surface (Kimura and Shinoda, 2010; Yoshihara et al., 2010). A such microscale sediment heterogeneity was captured in our dust data resulting larger deviations even for the same density of livestock ( $N$ ) and  $u_*$  is friction velocity ( $u_*$ ).

#### 4 Data analysis

It was demonstrated that microscale disturbance by marmots creates spatially heterogeneous grasslands at a fine scale (Yoshihara et al., 2010).

Moreover Appendix 1 and 2). To present dust emission on a local scale, the averaged values of measured dust emissions for a given livestock density is preferred. Because, it was emphasized that the livestock modified spatial heterogeneity at the landscape scale, whereas marmots modified spatial heterogeneity at the local scale (Yoshihara et al., 2010). Thus, in this study, we used the means of dust emission for investigating effect of trampling demonstrated that livestock affects grassland heterogeneity on a local scale, while marmots contribute to a small-scale surface heterogeneity (Yoshihara et al., 2010; Liu and Wang, 2014).

We calculated the mean values of dust emissions by averaging measured dust fluxes for each livestock density groups ( $N$  of 0, 201, 241 and 250 Head $ha^{-1}$ ). Data from each group for each friction velocity were treated separately.

We tested datasets normality with Shapiro-Wilk test. The Shapiro-Wilk test is widely used to define the normality when the sample number is below 50. It is believed that it works well with samples from 4 to 2000 (Razali et al., 2011). One-way analysis of variance (ANOVA) was used to determine if there is a difference in the mean dust emissions of livestock trampled surfaces (with livestock densities of 201, 241 and 250 Head $ha^{-1}$ ) from zero trampled surface. The determined coefficients for  $A$ ,  $\beta$  and  $\alpha$  are equal to 0.06853, 1.1 and 4 (Fig. 3c). We used

We employed OriginPro 8.1 Academic software (Northampton, MA 01060 USA) for calculating statistics and determining the coefficients by the least square optimization method with Levenberg-Marquardt algorithm (Moré, 1978) to determine the coefficients of  $A$ ,  $\beta$  and  $\alpha$ . The Levenberg-Marquardt (LM) algorithm is an iterative technique that locates the minimum of a function that is expressed as the sum of squares of nonlinear functions (Marquardt, 1963; Lampton, 1997). It has become a standard technique for nonlinear least-squares problems and widely adopted in a broad spectrum of disciplines. We employed

### 3.1 A scale factor to reveal effect of livestock trampling on dust emission

5 On a physical basis, livestock trampling weakens soil particle bonds to result an ease dust inputs released by wind blows ( $u_*$ ) into the atmosphere (Baddock et al., 2011; Macpherson et al., 2008). Surface disturbance does not directly cause dust emission but it does recover surface available dust (Zhang et al., 2016) and supply sediment to emit.

A scale factor is a number which scales, or multiplies, some quantity of natural dust emission ( $F_{REF}$ ) to get anthropogenic dust emission ( $F_N$ , influenced by livestock trampling). In this study, the scale factor (without unit) was calculated as a ratio between  $F_N$  and  $F_{REF}$ , as  $F_N/F_{REF}$ . The scale factor will be useful in the areas: 1) to differentiate natural dust emission ( $F_{REF}$ ) from anthropogenic dust emission ( $F_N$ ), and 2) to scale an effectual factor of livestock trampling on dust emission. If  $F_N/F_{REF} \simeq 1$ , will indicate no effect of livestock trampling on dust emission. If  $F_N/F_{REF} < 1$ , means suppressing effect of livestock trampling on dust emission, and if  $F_N/F_{REF} > 1$ , will point an increasing or enhancement effect of livestock trampling on dust emission.

## 4 Results

### 15 4.1 Livestock trampling effects on dust emission

The mean rate of  $PM_{10}$  emission from the test surface areas for each friction velocity of PI-SWERL<sup>®</sup> experiment reveals greater detail concerning the behaviour of dust emission and the effect of trampling (Fig. 4)(Appendix 1). The dust emission from the undisturbed, zero trampling surface at friction velocity  $u_*$  of  $0.44 \text{ ms}^{-1}$  was low ( $10.5 \mu\text{gm}^{-2}\text{s}^{-1}$ ). This was elevated to  $15.7 \mu\text{gm}^{-2}\text{s}^{-1}$  at  $u_*$  of  $0.54 \text{ ms}^{-1}$ , and then backed to background level  $10.1 \mu\text{gm}^{-2}\text{s}^{-1}$  at  $0.64 \text{ ms}^{-1}$ . A noticeably increased emission rates of 39 and  $37.3 \mu\text{gm}^{-2}\text{s}^{-1}$  are seen at the  $u_*$  of 0.73 and  $0.82 \text{ ms}^{-1}$  respectively, however, their difference was negligible. These dust emission behaviors in a change with  $u_*$ , which are in a sequential order for each PI-SWERL experiment, suggest that our sandy soil of temperate grassland is somewhat similar to a supply-limited surface with successive emission (Macpherson et al., 2008). In contrast, dust emission from trampling test areas presents that the disturbed, trampling surface is an unlimited-supply dust surface concerning its apparent increased emission rate with an increase in  $u_*$  (Fig. 4), except the case of  $0.64\text{ms}^{-1}$  subtle declined to  $0.64\text{ms}^{-1}$ .

At friction velocity of  $0.44 \text{ ms}^{-1}$ , although dust emission was almost doubled between zero trampling and  $N_{250}$  trampling, this difference was not statistically significant (Fig. 4b). Additionally to this, trampling effect is visible when considering an increase in mean dust fluxes with all trampling densities of 201, 241 and 250 head  $\text{ha}^{-1}$  (Fig. 4b). However, a such increase is invalid if include dust flux at zero trampling in comparisons with those  $N_{201}$  and  $N_{241}$  trappings, but their differences are very small. We used Shapiro-Wilk test (with a significance of  $\alpha = 0.05$ ) and standard deviation to assess whether the variables had a normal distribution and equilibrium or diverse variances in the statistical populations, respectively. Dust flux for zero

trampling surface shows statistically significant with the normality. Contrastingly, the insignificant normalities is demonstrated with the trampled area datasets (Fig. 4a) along with larger standard deviations (Fig. 4b), those are resulted by scattered data points from their sample populations (see Fig. 4a; data points with box chart of 25<sup>th</sup> and 75<sup>th</sup> percentiles). Higher diversity of dust fluxes presents morphological disparity and sedimentological diversification presence in livestock trampled test areas.

At moderate friction velocities of 0.54 and 0.64  $\text{ms}^{-1}$ , emission rates at  $N_{250}$  trampling area was almost 5 times larger of that

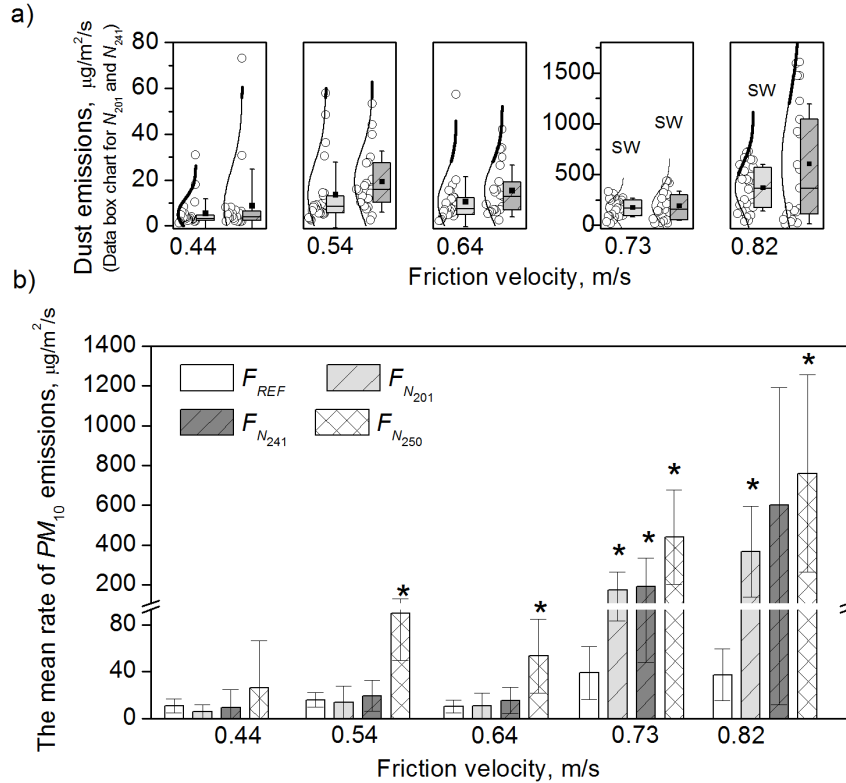

**Figure 4.** a) Measured dust fluxes from the trampled surfaces with  $N$  of 201 and 241  $\text{Headha}^{-1}$ . Open circles ( $\circ$ ) and curved lines ( $\cup$ ) denote collected dust data and normal distributions. Center dots ( $\bullet$ ) and dashes ( $-$ ) in the boxes denote means and medians of dust emissions. Opening and closing of the boxes presents 25 and 75<sup>th</sup> percentiles for each dataset. SW denote statistical significant datasets with Shapiro-Wilk normality test. b) Mean dust emission fluxes with standard deviations on correspondent friction velocities. The significant differences ( $p$  value with the significant level of 0.05) for mean dust emissions of the trampled surfaces from the  $F_{REF}$  on each friction velocity is denoted by \*.

5

zero trampling, and their differences was statistically significant (One-way ANOVA test;  $p$  value with 0.05) (Fig. 4b, denoted by \*). Trampling effect, which was visible for  $u_*$  of 0.44  $\text{ms}^{-1}$ , is apparent when observing increases in mean dust fluxes with all trampling densities for  $u_*$  of 0.54  $\text{ms}^{-1}$ , and for 0.64  $\text{ms}^{-1}$  includes even non-trampling (Fig. 4b). The insignificant normalities of emission rates with trampling densities of  $N_{201}$  and  $N_{241}$  (Fig. 4a) along with larger standard deviations (Fig. 4b) are demonstrated, as it was also seen for  $u_*$  of 0.44  $\text{ms}^{-1}$ . Emission rates with trampling densities of zero and  $N_{250}$

10

presents significant normalities, and this significance supports the difference of dust fluxes between zero trampling and  $N_{250}$  trampling (Fig. 4b, denoted by \*). Dust emission produced at  $0.54\text{ms}^{-1}$  was smaller than those at  $0.64\text{ms}^{-1}$  reflects similar surface emission characteristics to the undisturbed surface and types those are discussed by Macperson et al. 2008.

At high friction velocities of  $0.73$  and  $0.82\text{ms}^{-1}$ , trampling effect is strongly pronounced. It can be seen in enlarged emission rates at all trampling area from that zero trampling; specifically, 5-10 times for  $u_*$  of  $0.73\text{ms}^{-1}$ , and 10-20 times for  $u_*$  of  $0.82\text{ms}^{-1}$ . Consequently, emission rates at  $N_{201}$  and  $N_{250}$  significantly differ from that zero trampling, which is supported statistically by their significant normalities (Fig. 4b, denoted by \*). Moreover, an increase in mean dust fluxes with increase in  $N$  for all trampling densities (including non-trampling) also perceives the effect of trampling.

Overall, the effect of trampling on dust emissions was persistent throughout all friction velocities. Significantly higher dust loading was occurred after a disturbance level has reached by the trampling  $N_{250}$ . But, the disturbance level was lowered with an increase in wind force,  $u_*$ . It indicates the effect of trampling can be seen or get into a play in emission as strong as dust storm happens dust emission when wind gets stronger.

#### 4.2 A scale factor of dust emission due to livestock trampling function for dust emissions

The mean ratio of  $F_N$  and  $F_{REF}$  demonstrates the effect of trampling in dust emission as a relative rate scaling by  $F_{REF}$  for each  $u_*$ . Because every mean ratio is calculated under the same shear force ( $u_*$ ), it would remove the effect of  $u_*$  in the relative rate. For a given trampling density, therefore, we expected a constancy in the relative rate among all calculated scale factor for each  $N$  at different  $u_*$ . But in reality, the mean ratio varies at the same trampling density (Fig. 5a; As for an example,  $F_{N_{250}}/F_{REF}$  ranged values are shown in Figure 5. The scale factors for  $N_{250}$  varied from 2.5 to 20 ). This indicates that the effect of trampling can be dissimilar throughout  $u_*$ . Very interestingly, we found that the variabilities in the mean ratio is subject to changes in  $u_*$  demonstrating positive relationships for all trampling test areas (Fig. 5a). Thus the effect strength of trampling is likely to be determined by  $u_*$ . Some of the mean ratios are less than 5,  $F_{N_{250}}/F_{REF}$ . Similarly, the scale factors ranged between 0.8-16 and 0.5-10 for  $N_{241}$  and  $N_{201}$ , respectively. Very few of the scale factors were below 1, particularly at low friction velocities those were occurred at low  $u_*$  values for livestock trampling with  $N_{201}$  and  $N_{241}$   $\text{Headha}^{-1}$ , which also supports our idea on importance of high  $u_*$  for revealing the effect of trampling. Beside of  $u_*$ , trampling density ( $N$ ) also contributes the mean ratio variabilities to increase. It can be seen in the elevated mean ratios, those are increased from 10 (at  $N_{201}$ ) to 16 and 20 (at  $N_{241}$  and  $N_{250}$ , respectively), demonstrated for  $u_*$  of  $0.82$  (Fig. 5b). However, the differences between  $F_{N_{201}}/F_{REF}$  and  $F_{N_{241}}/F_{REF}$  become smaller as the value in  $u_*$  of  $0.82$  shifts to moderate and low values (Fig. 5b). This is consistent with the finding in section 5.1, that significantly higher dust loading occurs after a disturbance level has reached by the trampling  $N_{250}$ . But measuring the effect of trampling, in an interactive term of  $u_*$  and  $N$  is somewhat challenging). Consequently, 80% of the scale factors were greater than 1 revealing that livestock trampling had been likely enfolded an enhancement effect on dust emissions.

In addition, we can observe the significant positive relationships between the scale factor and  $u_*$  values for all trampling densities illustrated in Figure 5. The scale factors for  $N_{250}$  increased from 2.5 to 20 in response to an increase in  $u_*$  from 0.44

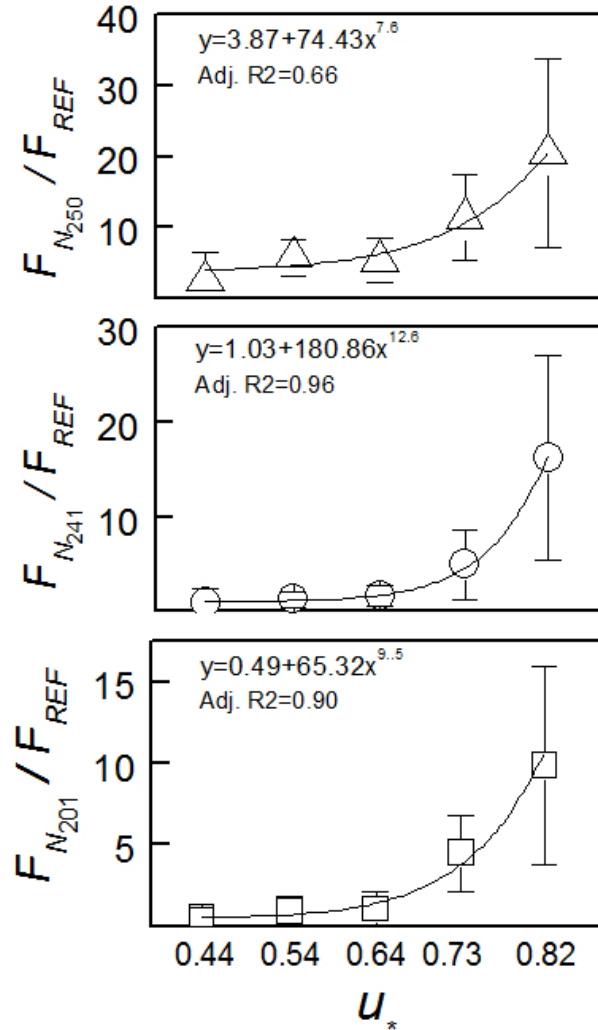

**Figure 5.** Dust emission ratio dependencies on friction velocity and livestock density. Open triangles ( $\Delta$ ), circles ( $\circ$ ), and squares ( $\square$ ) denote dust emission values from the trampled surfaces with livestock densities of 250, 241, 201 Head $ha^{-1}$ , respectively. a) Relationships between the mean emission ratio (of  $F_N / F_{REF}$ ) and  $u_*$  for  $N$  of 201, 241 and 250 Head $ha^{-1}$ ; **b.**

to  $0.82 \text{ ms}^{-1}$  (Fig. 5,  $F_{N_{250}} / F_{REF}$ ). The similar  $u_*$ -dependant positive relationships were manifested in the scale factors for  $N_{241}$  and  $N_{201}$  as well (Fig. 5,  $F_{N_{201}} / F_{REF}$  and  $F_{N_{241}} / F_{REF}$ ). This positive feedback of  $u_*$  on the scale factors strongly indicates that an increased  $u_*$  elevates the enhancement effect of livestock trampling on dust emission. Consequently, the livestock trampled grassland areas favor to emit a larger amount of dust in a comparison to that natural grasslands does,

5 particularly during at strong storms.

Moreover, an increase in the trampling density ( $N$ ) also results an increase in the scale factors (Fig. 4.3). The scale factors

for  $N_{250}$  were higher than those scale factors for  $N_{201}$ ,  $N_{241}$  at all  $u_*$  values as depicted in Figure 4.3. This increase in the scale factors in response to an increased  $N$  is more apparent for high  $u_*$  of  $0.82 \text{ ms}^{-1}$  in Figure 4.3. It demonstrates that scale factors of 10, 16 and 20 were corresponding to  $N_{201}$ ,  $N_{241}$  and  $N_{250}$ , respectively (Fig. 4.3). However, the differences in the scale factors between  $F_{N_{201}}/F_{REF}$  and  $F_{N_{241}}/F_{REF}$  was negligible at the moderate and low  $u_*$  values (Fig. 4.3). The scale factor is proportional to  $u_*^{8.39}$  (Fig. 4.3) for all variables, whereas its rate vary over orders for  $u_*^{7.6} - u_*^{12.6}$  a given  $N$  (Fig. 5). These results suggest that both  $u_*$  and  $N$  has enormous combinational effect on dust emission from trampling test surface, and eventually, determines the effect strength of trampling.

## 5 Discussion

### 5.1 The effect of trampling on dust emission

We found substantial effect of the trampling on dust emission. The mean rate of  $PM_{10}$  emission from the test surface areas for each friction velocity of PI-SWERL<sup>®</sup> experiment reveals greater detail concerning the behaviour of dust emission and the effect of trampling (Fig. 4).

The dust emission from the undisturbed, zero trampling surface at friction velocity  $u_*$  of  $0.44 \text{ ms}^{-1}$  was low ( $10.5 \mu\text{gm}^{-2}\text{s}^{-1}$ ). It was elevated to  $15.7 \mu\text{gm}^{-2}\text{s}^{-1}$  at  $u_*$  of  $0.54 \text{ ms}^{-1}$ , and then backed to background level  $10.1 \mu\text{gm}^{-2}\text{s}^{-1}$  at  $0.64 \text{ ms}^{-1}$ . A noticeably increased emission rates of 39 and  $37.3 \mu\text{gm}^{-2}\text{s}^{-1}$  are seen at the  $u_*$  of  $0.73$  and  $0.82 \text{ ms}^{-1}$  respectively, however, their difference was negligible. These dust emission changeable behaviors in a change with  $u_*$ , those are in a sequential order of shear stress for each PI-SWERL experiment, suggest that our sandy soil of temperate grassland is somewhat similar to a supply-limited surface with successive emission (Macpherson et al., 2008). This is consistent with the hypothesis for supply-limited surfaces that the quantity of dust ejected into the atmosphere is controlled by the capacity of the surface to release fine particles (Nickling and Gillies, 1993).

In contrast to the undisturbed surface, that the disturbed, trampling surface behaves as an unlimited-supply dust surface, concerning its consistent increase in emission rate with an increase in  $u_*$  (Fig. 4), except the case of  $0.64 \text{ ms}^{-1}$  a subtle decline to  $0.54 \text{ ms}^{-1}$ . This shift in natural soil, from supply limitedness to unlimited supply surface, could be explained by the weakening of inter particle bonds, as a consequence of trampling (Belnap et al., 2007; Baddock et al., 2011; Macpherson et al., 2008). In some crusted desert soils with higher sand contents, disturbance can lead to increased sand availability and the occurrence of effective abrasion (e.g., Belnap and Gillette, 1997). In conjunction to this explanation, we observed increased dust emission from the trampling test areas in comparison to those from zero trampling, despite similar ranges in shear velocity. Their differences was statistically significant (One-way ANOVA test; p value with 0.05) (Fig. 4b, denoted by \*) at most of  $u_*$ , particularly for  $N_{250}$  trampling. Observed emission rate at  $N_{250}$  trampling were 26.1 and  $760 \mu\text{gm}^{-2}\text{s}^{-1}$ , those value are approximately 2 and 20 times greater than those zero trampling, measured at  $u_*$  of  $0.44$  to  $0.82 \text{ ms}^{-1}$ . Supportingly with these facts, we could conclude that emission rates from the trampling test areas were much greater than the zero trampling surface because of the larger supplies of loose surface dust. It indicates the substantial effect of trampling (for dust loads) has been taken place on Mongolian temperate grassland, where is endured traditional animal husbandry for centuries. However, we are not able to give



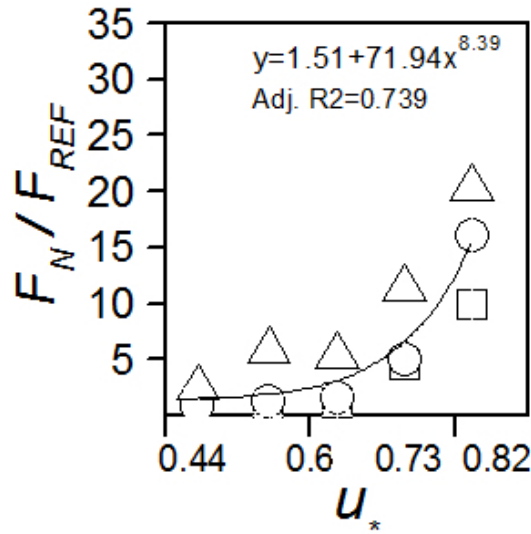

**Figure 6.** A statistically fitted relationship between dust emission ratios and  $u_*$  for all livestock trampled surfaces; e) A relationship between dust emission ratio and Cobb-Douglas production function of  $N$  and  $u_*$ ; d) A plot of  $F_N/F_{REF}$  versus  $1 + f_L(N, u_*)$ .  $n$  denotes sample number,  $\nu$  is degree of freedom,  $\chi/\nu$  is the reduced chi square,  $RMSE$  is root mean square error,  $Adj.R^2$  is adjusted  $r^2$ , residual sum of squares.

Anthropogenic dust emission formula is defined in (Section 3.1). If we divide both side of Equation by  $F_{REF}$ , it will yield an Equation. This equation suggests that the livestock trampling function,  $f_L(N, u_*)$ , can be obtained by the mean emission ratio,  $F_N/F_{REF}$ , presented in Figure 5b.

$$F_N/F_{REF} = 1 + f_L(N, u_*)$$

$$f_L(N, u_*) = 0.06853N^{1.1}u_*^4, \quad \text{for } 240 < N \leq 250 \text{ and } 0.44 \leq u_* \leq 0.82$$

The determined  $A$ ,  $\alpha$  and  $\beta$  for  $f_L(N, u_*)$  illustrated in Figure 5c, and the defined  $f_L(N, u_*)$  presented in Eq. Both of  $\alpha > 1$  and  $\beta > 1$  indicates the increasing scale for each component return. This means that 15% of increase will return 16.6% in  $N$  and 74.9% in  $u_*$  of increased  $f_L(N, u_*)$  output. Consequently, effect of trampling will be magnified by an increase in both  $N$  and  $u_*$ . The magnitude strength is greater with a change in  $u_*$  than in  $N$ . We examined a performance of the defined  $f_L(N, u_*)$ , Eq., plotting against  $F_N/F_{REF}$  in Figure 5c.

It validates the well-parameterization for  $f_L(N, u_*)$ , illustrating a reasonable error ( $RMSE = 2.96$ ), a good fit ( $Adj.r^2 = 0.87$ ) and a significant value ( $p < 0.05$ ; by reduced  $\chi^2$  test) between the term of  $1 + f_L(N, u_*)$  and  $F_N/F_{REF}$  (Fig. 5d). This ensures that livestock trampling function is applicable to assess the effect of trampling; however, a valid range is limited (Eq.).

### 4.3 An application of $f_L(N, u_*)$ for assessing dust emission flux

Applying the results tackled in Section 5.2, anthropogenic dust can be assessed by Equation, however the valid range for  $N$  is much narrow.

This limits the usage of the Eq. to assess  $F_N$  in a broad range of areas (for Mongolia), where livestock density varies spatially (Saizen et al., 2010).

$$F_N = F_{REF}(1 + f_L(N, u_*)), \quad \text{for } 200 \leq N \leq 250 \text{ and } 0.44 \leq u_* \leq 0.82$$

To extend applicability of the eq., we merged the valid range of  $200 \leq N \leq 250$  down to  $0 \leq N \leq 250$ , concerning that equation yields  $F_N = F_{REF}$ , when  $N = 0$ . This will also provide an opportunity to assess natural dust within the equation. Thus, we generalized eq. into

further insight at this point for increased dust contribution either from directly the availability of readily suspendable sediment or indirectly the process relationship between abrasive saltation by disturbance and dust emission, those are discussed in detail by (Macpherson et al., 2008; Baddock et al., 2011; Zhang et al., 2016).

It was demonstrated that wind erosion and deposition processes forms uneven spatial distribution of dust supplements as driven by microclimatic, sedimentological, geochemical, surface patchiness and biological conditions (Gill, 1996). Likewise, we noticed larger standard deviations (Fig. 4b), those are resulted by scattered data points from their sample populations (see Fig. 4a; data points with box chart of 25<sup>th</sup> and 75<sup>th</sup> percentiles). Higher diversity of dust fluxes presents morphological disparity and sedimentological diversification presence in test areas. It may be caused by as a result of the aeolian processes, the dust emissions are highly variable with space and between distinct landforms, even within individual landforms (Gill, 1996; Reynolds et al., 2007). Another reason it may be related to that dust flux does not come to a similar saturation from a field site (Gillette and Passi, 1988). One of possible microscale disturbance by marmots creates spatially heterogeneous grasslands at a fine scale (Yoshihara et al., 2010). Moreover, it was emphasized that the livestock modified spatial heterogeneity at the landscape scale, whereas marmots modified spatial heterogeneity at the local scale (Yoshihara et al., 2010).

## 5.2 Effect strength-A scale factor of dust emission by livestock trampling

Very interestingly, we found that the variabilities in the mean ratio of  $F_N$  and  $F_{REF}$  scale factor of  $F_N/F_{REF}$  is subject to changes in  $u_*$  demonstrating positive relationships for all trampling test areas (Fig. 5a). As for an example,  $F_{N_{250}}/F_{REF}$  ranged from 2.5 to 20 for  $u_*$  values increased from 0.44 to 0.82 (Fig. 5). It points that the effect strength of scale factor of dust emission by trampling get magnified with an increase in  $u_*$ . This means that anthropogenic dust emits much as stronger wind prevails at the trampled surfaces wind blows stronger, like revealing 'hidden effect' of trampling. Some of the mean ratios below 1, particularly at low friction velocities for livestock trampling with  $N_{201}$  and  $N_{241}$  (Fig. 5). These low scale factors, in turn, supports the idea that (hidden) enhancement effect of trampling on dust emission requires high  $u_*$  to be revealed out. This  $u_*$ -magnified effect of trampling livestock trampling on dust emission is a coincidence with the dust emissivity pattern of unlimited supply surfaces, discussed in Section 6.1. Our finding may hint the possible reason of huge amount of dust loading happenings when it originates from Mongolia (Laurent et al., 2006) 5.1.

Beside of  $u_*$ , trampling density ( $N$ ) also contribute the mean ratio variabilities to increase. It can be seen in the elevated mean ratios, those are increased from 10 (at  $N_{201}$ ) to 16 and 20 (at  $N_{241}$  and  $N_{250}$  respectively). Additionally, an increased trampling density elevated the scale factors. Larger scale factors was observed for  $N_{250}$ , respectively, demonstrated for  $u_*$  of 0.82 (Fig. 5b). It is likely that increased  $N$  results an elevated dust emission. However, the differences between  $F_{N_{201}}/F_{REF}$  and  $F_{N_{241}}/F_{REF}$  become smaller as the value in  $u_*$  of 0.82 shifts to moderate and low than those for  $N_{241}$  and  $N_{201}$  at all  $u_*$  values (Fig. 5b4.3).

Relatedly, greater dust loading was manifested at the trampling density of  $N_{250}$ , and not, for  $N_{241}$  and  $N_{201}$  (Fig. 4b, denoted by \*). This indicates significantly higher dust loading emission occurs after a disturbance level has reached to  $N_{250}$ . Similar A similar result of increased dust occurrence with the disturbance level for cattle passes was presented (Baddock et al., 2011). Surprisingly, we observed that the disturbance level for the significant dust emission (comparably to  $F_{REF}$ ) was lowered

with an increase in wind force,  $u_*$  (Fig. 4b). ~~This suggests~~ Our research findings indicate that both  $u_*$  and  $N$  has enormous combinational ~~effect on dust emission from trampling test surface~~ influence on anthropogenic dust emission due to livestock trampling effect, and eventually, determines the effect strength of ~~trampling~~. ~~But to measuring~~ livestock trampling on dust emission. ~~But, summarizing~~ the effect of trampling, in an interactive (combinational) term of  $u_*$  and  $N$  livestock trampling on dust emission is somewhat challenging.

~~In the livestock trampling function, almost 4 times greater of determinant power for  $u_*$  than of for~~ Figure 7 illustrates a tabular chart of a scale factor for the different values in  $N$  was presented. It points that the effect strength of trampling get magnified and  $u_*$ . It is apparent that the scale factor is gradually increased with an increase both in  $u_*$ , and, therefore dust will emit much as stronger wind prevails at the trampled surfaces. This finding indicates that the effect of trampling can be seen or get into a play in emission when wind is strong.

### 5.3 The applicability of $f_L(N, u_*)$ function for assessing anthropogenic dust

~~We confirmed that eq. has a feasible potential to assess dust emission fluxes, properly. Based on our eq. (considering  $F = F_{REF} + F_N$ ), anthropogenic dust is proportional to  $u_*^8$ . This is in a good agreement with dust fluxes proportional to  $u_*^6$  for natural soil with abrasion and  $u_*^{10}$  for fully unlimited supply soil (Zhang et al., 2016). Importantly, it implies that anthropogenic dust flux induced by trampling at a temperate grassland has a emission potent in between those have at natural soil with abrasion and fully unlimited supply. However, the threshold friction velocity should be included further for a better prediction performance, precisely (Gillette and Passi, 1988; Belnap and Gillette, 1997). Moreover~~ and  $N$ . As displayed in Figure 7, the fixed  $u_*$  versus the fixed range of  $N$  delimits an application range of the tabular chart. Moreover, primary conditions of land surface (dry soil and low vegetation) that should be met for a direct use of the scale factor. Spatially, an application of the tabular chart of the scale factor (Fig. 7) is limited to the temperate grassland, which occupies over 30% of the total territory of the country. Furthermore, this type of chart will be quite useful for assessing anthropogenic dust emission due to livestock trampling when natural dust emission is known. Therefore, implication of the chart should be considered the valid range for livestock density, friction velocity, and land surface conditions.

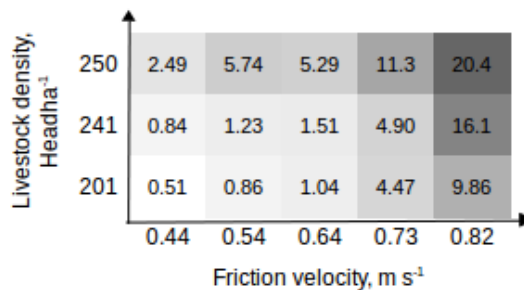

**Figure 7.** A table chart of scale factor ( $F_N/F_{REF}$ ) with different  $u_*$  and  $N$  of 201, 241 and 250 Headha<sup>-1</sup> per year. A color gradient from light to dark gray corresponds to an increase in the scale factor.

Future work is needed to discover the scale factor (or anthropogenic dust due to trampling) relationships on unlimited, natural variations of soil moisture, and crust strengths. Because it is well-known that livestock trampling deteriorates soil physical parameters (infiltration rate, bulk density, water release curve) (Tollner et al., 1990; Greenwood and McKenzie, 2001) and destroys surface soil structure or crust (Zhang et al., 2006; Liu and Wang, 2014). Damage in soil physical properties gets augmented when the soil is moist at the time of trampling (Warren et al., 1986). Consequently, it would be a way better to develop the scale factor as a functionally related to not only  $u_*$  and  $N$ , but also dependant on soil moisture and crust. However, dust emissions cannot be perfectly estimated (Shao, 2001; Uno et al., 2006) using only livestock density information due to the influence of many other environmental-surface variables (Shinoda et al., 2011) such as soil aggregation (Ishizuka et al. (2012), soil moisture (Fécan et al., 1998; Ishizuka et al., 2009), vegetation roughness (Kimura and Shinoda, 2010; Nandintsetseg and Shinoda, 2015) and surface-patchiness. Therefore, the direct use of our trampling function for assessing anthropogenic dust is limited to the temperate grassland. Implication should be given attention to the valid range for livestock density and friction velocity;  $u_{*c}$  atmospheric forcings include air temperature, relative humidity and wind speed (Park and In, 2003; Park et al., 2010). We calculated  $N$  as a total livestock number, which needs to be considered livestock different types. The assessment should be on annual basis, but can be modified to the required time period if grazing route is known. The applicability of our dust flux formula to other areas beyond the study location could be accomplished with PI-SWERL tests over a wider geographic area. As we mentioned, potential dust emission data obtained by PI-SWERL, so that formula  $F$ , with eq., will also provide a possible evaluation of potential anthropogenic dust. We calculated  $N$  as a total livestock number, which needs to be resolved in the near future. We In this study, we assumed that all types of livestock (small and large ruminants) has the same effect on land surface trampling, irrespective of the size or distribution of the footprints. In addition, we made no distinction between the weights of the different livestock species. However, the potential variability due to the difference in livestock weights warrants further investigation. (Xu, 2014) tested the quantity of dust emitted from vehicles and found that it varied with the weight of the vehicles. It should be noted that the scale factor provides a possible evaluation of potential anthropogenic dust emission. The applicability of the tabular chart of the scale factor to the other grasslands areas beyond the study location could be accomplished with PI-SWERL tests over a wider geographic area.

## 6 Conclusions

In this study, we aimed to reveal effect of We studied effects of livestock trampling on dust emission processes, in a quantitative manner. For achieving study aim, we investigated effect of livestock trampling on dust emissions, developed a livestock trampling function for emission rate, and finally discussed the reliability of the trampling function and its applicability for assessing anthropogenic dust. Based on our results, we drawn major conclusions as :-

Finally, we strength conducting PI-SWERL<sup>®</sup> experiment in a temperate grassland of Mongolia. A significant increase in dust emission was manifested with an elevated trampling density and an increased friction velocity. The scale factor demonstrated that 1) dust emission is greatly enhanced due to livestock trampling; 2) the enhancement rate in the dust emission is magnified

by an increase in  $u_*$ , and elevated subtly by an increase in  $N$ . Overall, our results indicated that the effect of trampling can be seen or get into a play in dust emission as friction velocity increases. We recommend that a better management for livestock allocation coupled with strategies to prevent dust loads such as reducing wind speed with a shelter, or vegetation planting is needed, however, there are many uncertainties and assumptions to be improved in this study. ~~The applicability of our result is~~

5 ~~feasible with a care to other areas beyond the study location.~~

## 7 Data availability

The underlying data can be found in the Appendix.

## Appendix A: Appendix A

### A1 Appendix A1

**Table 2.** Land surface and soil size characteristics in the study area

| $u_*$ , $\text{ms}^{-1}$ | Measured dust emissions, $\mu\text{gm}^2\text{s}^{-1}$ |       |       |       |       |               |        |       |        |         |
|--------------------------|--------------------------------------------------------|-------|-------|-------|-------|---------------|--------|-------|--------|---------|
|                          | $F_{REF}$                                              |       |       |       |       | $F_{N_{250}}$ |        |       |        |         |
|                          | 0.44                                                   | 0.54  | 0.64  | 0.73  | 0.82  | 0.44          | 0.54   | 0.64  | 0.73   | 0.82    |
|                          | 7.75                                                   | 14.87 | 9.95  | 17.14 | 13.71 | 86.76         | 73.70  | 32.08 | 141.49 | 110.21  |
|                          | 7.58                                                   | 16.11 | 9.60  | 25.77 | 32.44 | 5.92          | 125.49 | 87.57 | 677.31 | 928.18  |
|                          | 17.08                                                  | 16.47 | 20.31 | 58.69 | 83.07 | 4.41          | 40.24  | 21.06 | 370.49 | 709.59  |
|                          | 6.88                                                   | 16.62 | 9.22  | 28.64 | 23.24 | 7.18          | 120.81 | 72.79 | 571.93 | 1292.03 |
|                          | 12.21                                                  | 15.00 | 7.32  | 39.68 | 32.53 |               |        |       |        |         |
|                          | 19.59                                                  | 26.07 | 11.60 | 79.69 | 37.85 |               |        |       |        |         |
|                          | 2.07                                                   | 4.51  | 2.54  | 23.12 | 38.46 |               |        |       |        |         |
| Mean                     | 10.5                                                   | 15.7  | 10.1  | 39.0  | 37.3  | 26.1          | 90.1   | 53.4  | 440.3  | 760.0   |
| SD                       | 6.2                                                    | 6.3   | 5.4   | 22.6  | 22.0  | 40.5          | 40.6   | 31.9  | 236.4  | 495.3   |

## A2 Appendix A2

**Table 3.** Land surface and soil size characteristics in the study area

| $u_*$ , $\text{ms}^{-1}$ | Measured dust emissions, $\mu\text{gm}^2\text{s}^{-1}$ |       |        |        |       |               |       |        |         |       |
|--------------------------|--------------------------------------------------------|-------|--------|--------|-------|---------------|-------|--------|---------|-------|
|                          | $F_{N_{201}}$                                          |       |        |        |       | $F_{N_{241}}$ |       |        |         |       |
|                          | 0.44                                                   | 0.54  | 0.64   | 0.73   | 0.82  | 0.44          | 0.54  | 0.64   | 0.73    | 0.82  |
| 2.07                     | 9.10                                                   | 9.36  | 268.38 | 569.14 | 1.89  | 4.37          | 8.50  | 412.38 | 1469.22 |       |
| 2.4                      | 5.45                                                   | 4.51  | 247.47 | 477.52 | 6.34  | 15.92         | 12.9  | 124.73 | 165.94  |       |
| 1.97                     | 5.06                                                   | 4.19  | 215.55 | 433.93 | 72.99 | 14.31         | 7.07  | 24.52  | 23.24   |       |
| 2.71                     | 5.67                                                   | 5.85  | 97.96  | 641.01 | 1.82  | 2.51          | 2.49  | 50.45  | 131.55  |       |
| 2.97                     | 9.64                                                   | 7.49  | 229.35 | 648.04 | 5.67  | 20.25         | 13.4  | 153.83 | 143.61  |       |
| 4.09                     | 11.62                                                  | 10.44 | 222.24 | 452.61 | 1.99  | 8.14          | 6.04  | 42.57  | 55.1    |       |
| 2.94                     | 5.68                                                   | 6.42  | 146.43 | 223.69 | 1.97  | 7.37          | 7.06  | 191.46 | 899.14  |       |
| 3.21                     | 14.28                                                  | 12.41 | 160.77 | 365.88 | 4.01  | 29.91         | 19.13 | 246.65 | 551.89  |       |
| 2.75                     | 6.13                                                   | 5.15  | 217.09 | 533.54 | 6.83  | 11.98         | 7.16  | 26.54  | 31.83   |       |
| 2.73                     | 5.61                                                   | 4.85  | 85.18  | 177.24 | 2.26  | 8.52          | 6.12  | 137.08 | 596.04  |       |
| 2.37                     | 8.57                                                   | 12.44 | 276.89 | 450.74 | 3.31  | 18.58         | 33.96 | 300.54 | 923.68  |       |
| 3.41                     | 9.2                                                    | 7.78  | 170.03 | 728.82 | 5.25  | 17.48         | 15.43 | 213.66 | 1042.76 |       |
| 3.81                     | 8.02                                                   | 17.81 | 308.82 | 712.61 | 4.08  | 27.73         | 29.94 | 432.75 | 1472.39 |       |
| 3.76                     | 8.9                                                    | 11.64 | 259.24 | 597.8  | 8.05  | 44.2          | 42.09 | 433.13 | 1592.87 |       |
| 31.04                    | 48.44                                                  | 15.28 | 244.37 | 354.01 | 30.71 | 53.14         | 26.27 | 143.26 | 180.92  |       |
| 5.52                     | 13.13                                                  | 9.85  | 145.49 | 210.6  | 3.56  | 12.87         | 6.02  | 47.52  | 107.3   |       |
| 8.4                      | 14.43                                                  | 15.37 | 261.1  | 661.45 | 5.7   | 10.29         | 5.31  | 16.61  | 10.14   |       |
| 18.14                    | 36.23                                                  | 20    | 79.97  | 93.23  | 3.62  | 39.83         | 33.47 | 369.67 | 365.11  |       |
| 3.56                     | 8.09                                                   | 7.07  | 48.61  | 46.17  | 4.98  | 15.48         | 9.29  | 62.39  | 56.63   |       |
| 6.06                     | 30.54                                                  | 57.19 | 330.62 | 253.18 | 1.98  | 15.89         | 14.71 | 319.52 | 1221.66 |       |
| 10.36                    | 57.89                                                  | 6.34  | 109.65 | 81.43  | 8.08  | 27.42         | 15.96 | 262.56 | 1604.88 |       |
| 4.69                     | 6.57                                                   | 3.77  | 18.18  | 36.43  |       |               |       |        |         |       |
| 2.15                     | 2.52                                                   | 2.71  | 90.26  | 136.25 |       |               |       |        |         |       |
| 1.58                     | 2.94                                                   | 2.34  | 90.37  | 197.62 |       |               |       |        |         |       |
| 1.2                      | 3.64                                                   | 2.12  | 33.32  | 115.36 |       |               |       |        |         |       |
| Mean                     | 5.4                                                    | 13.5  | 10.5   | 174.3  | 367.9 | 8.8           | 19.3  | 15.3   | 191     | 602.2 |
| SD                       | 6.4                                                    | 14.3  | 10.9   | 91     | 228.4 | 15.9          | 13.4  | 11.3   | 143.2   | 590.6 |

## A3 Appendix A3

It is necessary to provide the uncertainty of dust flux formula,  $\delta F$ , (since Eq. is derived based on the mean values  $F_N$  for  $N$ ). We estimated uncertainties of the calculated dust flux for each  $u_*$ , thus the uncertainty will be converted to Eq. by substituting Eq. 3; and, considering  $u_*$  as a constant for a given friction velocity:-

5 
$$\delta F = |cu_*^4| \delta(1 + f_L(N, u_*)) \xrightarrow{\text{substitution of } F_N/F_{REF}} \text{ will yield } \delta F = |cu_*^4| \delta(F/F_{REF}).$$

If we apply uncertainty analysis for multiplication (Taylor, 1997) into Eq., we will obtain Eq.??-

$$\delta F = |cu_*^4| \frac{F}{F_{REF}} \sqrt{\left(\frac{\delta F}{F}\right)^2 + \left(\frac{\delta F_{REF}}{F_{REF}}\right)^2}$$

where  $\delta F$  and  $\delta F_{REF}$  are uncertainties of  $F$  and  $F_{REF}$ , respectively. Hereafter, we estimated  $\delta F$  and  $\delta F_{REF}$  using the basic statistical methodology for calculating uncertainty as a standard error of the mean value ((Taylor, 1997; Coleman and Steele, 2009).

10 It has been proven by Taylor (1997) that the standard error of the mean value for a certain population is defined as that a standard deviation of a given population ( $SD$ ) is divided by the square root of its population number ( $\sqrt{n}$ ). Thus, we calculated the uncertainty in the means of  $F$  as  $\delta F = \frac{SD}{\sqrt{n}}$ . As for a small dataset (Taylor (1997); Coleman and Steele (2009)),

we calculated uncertainty in the means of  $F_{REF}$  as  $\delta F_{REF} = \frac{F_{REF,max} - F_{REF,min}}{2\sqrt{n}}$  using the maximum ( $F_{REF,max}$ ) and minimum ( $F_{REF,min}$ ) values among the dataset for the non-trampled surfaces. For defining  $\delta F_{REF}$ , first we solved

15 
$$\sqrt{\left(\frac{\delta F}{F}\right)^2 + \left(\frac{\delta F_{REF}}{F_{REF}}\right)^2}$$
 as 0.41, 0.31, 0.37, 0.32, and 0.37 for each  $u_*$  of 0.44, 0.54, 0.64, 0.73, and 0.82 . For general use,

we adopted the mean of the solved  $\sqrt{\left(\frac{\delta F}{F}\right)^2 + \left(\frac{\delta F_{REF}}{F_{REF}}\right)^2}$  values, thus  $\delta F$  is defined as in Eq.??-

$$\delta F = 0.36F$$

We can interpret the uncertainty of dust flux is 0.36 times as much as the calculated dust flux (Eq. 3S)-



*Acknowledgements.* The authors gratefully thank Dr. James King, Université de Montréal, Canada for his support during the PI-SWERL<sup>®</sup> experiment in the field. ~~We also and~~ specially thank Dr. Battur Gompil, National University of Mongolia for his useful advice ~~on Cobb-Douglas formula for the~~ for the manuscript. We gladly thank the editor and two anonymous referees for their well-instructed comments and helpful  
5 suggestions that greatly improved this manuscript. This study was supported by the Grant-in-Aid for Scientific Research (S) from JSPS 'Integrating Dryland Disaster Science' (No.25220201) at Nagoya University and 'Advanced Research Grant 2017' at National University of Mongolia, Mongolia.

## References

- ANDREW, M. H. and LANGE, R. T.: Development of a new piosphere in arid chenopod shrubland grazed by sheep. 1. Changes to the soil surface, *Austral Ecology*, 11, 395–409, 1986.
- 5 Baddock, M. C., Zobeck, T. M., Van Pelt, R. S., and Fredrickson, E. L.: Dust emissions from undisturbed and disturbed, crusted playa surfaces: Cattle trampling effects, *Aeolian Research*, 3, 31–41, 2011.
- Bat-Oyun, T., Shinoda, M., Cheng, Y., and Purevdorj, Y.: Effects of grazing and precipitation variability on vegetation dynamics in a Mongolian dry steppe, *Journal of Plant Ecology*, p. rtv083, 2016.
- Begzsuren, S., Ellis, J. E., Ojima, D. S., Coughenour, M. B., and Chuluun, T.: Livestock responses to droughts and severe winter weather in the Gobi Three Beauty National Park, Mongolia, *Journal of Arid environments*, 59, 785–796, 2004.
- 10 Belnap, J. and Gillette, D.: Disturbance of biological soil crusts: impacts on potential wind erodibility of sandy desert soils in southeastern Utah, *Land Degradation & Development*, 8, 355–362, 1997.
- Belnap, J., Phillips, S. L., Herrick, J., and Johansen, J.: Wind erodibility of soils at Fort Irwin, California (Mojave Desert), USA, before and after trampling disturbance: implications for land management, *Earth Surface Processes and Landforms*, 32, 75–84, 2007.
- 15 Cheng, B., Dai, H., Wang, P., Zhao, D., and Masui, T.: Impacts of carbon trading scheme on air pollutant emissions in Guangdong Province of China, *Energy for sustainable development*, 27, 174–185, 2015.
- Cheng, Y., Tsubo, M., Ito, T., Nishihara, E., and Shinoda, M.: Impact of rainfall variability and grazing pressure on plant diversity in Mongolian grasslands, *Journal of Arid Environments*, 75, 471–476, 2011.
- Coleman, H. W. and Steele, W. G.: *Experimentation, validation, and uncertainty analysis for engineers*, John Wiley & Sons, 2009.
- 20 Dong, F., Li, X., Long, R., and Liu, X.: Regional carbon emission performance in China according to a stochastic frontier model, *Renewable and Sustainable Energy Reviews*, 28, 525–530, 2013.
- DUST-QUANT, L.: *User's Guide for the Miniature Portable In-situ Wind Erosion lab (PI-SWERL)*, 2009.
- Etyemezian, V., Nikolich, G., Ahonen, S., Pitchford, M., Sweeney, M., Purcell, R., Gillies, J., and Kuhns, H.: The Portable In Situ Wind Erosion Laboratory (PI-SWERL): A new method to measure PM 10 windblown dust properties and potential for emissions, *Atmospheric*
- 25 *Environment*, 41, 3789–3796, 2007.
- Fécan, F., Marticorena, B., and Bergametti, G.: Parametrization of the increase of the aeolian erosion threshold wind friction velocity due to soil moisture for arid and semi-arid areas, in: *Annales Geophysicae*, vol. 17, pp. 149–157, Springer, 1998.
- Fernandez-Gimenez, M. and Allen-Diaz, B.: Vegetation change along gradients from water sources in three grazed Mongolian ecosystems, *Plant Ecology*, 157, 101–118, 2001.
- 30 Fu, P., Huang, J., Li, C., and Zhong, S.: The properties of dust aerosol and reducing tendency of the dust storms in northwest China, *Atmospheric Environment*, 42, 5896–5904, 2008.
- Fujita, N., Amartuvshin, N., and Ariunbold, E.: Vegetation interactions for the better understanding of a Mongolian ecosystem network, in: *The Mongolian Ecosystem Network*, pp. 157–184, Springer, 2013.
- Gill, T. E.: Eolian sediments generated by anthropogenic disturbance of playas: human impacts on the geomorphic system and geomorphic
- 35 impacts on the human system, *Geomorphology*, 17, 207–228, 1996.
- Gillette, D. A. and Passi, R.: Modeling dust emission caused by wind erosion, *Journal of Geophysical Research: Atmospheres* (1984–2012), 93, 14 233–14 242, 1988.

- Ginoux, P., Prospero, J. M., Gill, T. E., Hsu, N. C., and Zhao, M.: Global-scale attribution of anthropogenic and natural dust sources and their emission rates based on MODIS Deep Blue aerosol products, *Reviews of Geophysics*, 50, 2012.
- Greenwood, K. and McKenzie, B.: Grazing effects on soil physical properties and the consequences for pastures: a review, *Animal Production Science*, 41, 1231–1250, 2001.
- 5 Hilker, T., Natsagdorj, E., Waring, R. H., Lyapustin, A., and Wang, Y.: Satellite observed widespread decline in Mongolian grasslands largely due to overgrazing, *Global Change Biology*, 20, 418–428, 2014.
- Hoffmann, C., Funk, R., Wieland, R., Li, Y., and Sommer, M.: Effects of grazing and topography on dust flux and deposition in the Xilingele grassland, Inner Mongolia, *Journal of Arid Environments*, 72, 792–807, 2008.
- 10 Houser, C. A. and Nickling, W. G.: The emission and vertical flux of particulate matter < 10  $\mu\text{m}$  from a disturbed clay-crust surface, *Sedimentology*, 48, 255–267, 2001.
- Huang, J., Wang, T., Wang, W., Li, Z., and Yan, H.: Climate effects of dust aerosols over East Asian arid and semiarid regions, *Journal of Geophysical Research: Atmospheres*, 119, 2014.
- Huang, J., Yu, H., Guan, X., Wang, G., and Guo, R.: Accelerated dryland expansion under climate change, *Nature Climate Change*, 2015.
- 15 Huang, J., Ji, M., Xie, Y., Wang, S., He, Y., and Ran, J.: Global semi-arid climate change over last 60 years, *Climate Dynamics*, 46, 1131–1150, 2016.
- Huston, M. A. and Huston, M. A.: *Biological diversity: the coexistence of species*, Cambridge University Press, 1994.
- Ishizuka, M., Mikami, M., Yamada, Y., and Zeng, F.: Threshold friction velocities of saltation sand particles for different soil moisture conditions in the Taklimakan Desert, *Sola*, 5, 184–187, 2009.
- 20 Ishizuka, M., Mikami, M., Yamada, Y., Kimura, R., Kurosaki, Y., Jugder, D., Gantsetseg, B., Cheng, Y., and Shinoda, M.: Does ground surface soil aggregation affect transition of the wind speed threshold for saltation and dust emission?, *SOLA*, 8, 129–132, 2012.
- Kimura, R. and Shinoda, M.: Spatial distribution of threshold wind speeds for dust outbreaks in northeast Asia, *Geomorphology*, 114, 319–325, 2010.
- Kurosaki, Y., Shinoda, M., and Mikami, M.: What caused a recent increase in dust outbreaks over East Asia?, *Geophysical Research Letters*, 25, 38, 2011.
- Labini, P. S.: Why the interpretation of the Cobb-Douglas production function must be radically changed, *Structural change and economic dynamics*, 6, 485–504, 1995.
- Lampton, M.: Damping–undamping strategies for the Levenberg–Marquardt nonlinear least-squares method, *Computers in Physics*, 11, 110–115, 1997.
- 30 Landsberg, J., James, C. D., Morton, S. R., Müller, W. J., and Stol, J.: Abundance and composition of plant species along grazing gradients in Australian rangelands, *Journal of Applied Ecology*, 40, 1008–1024, 2003.
- Laurent, B., Marticorena, B., Bergametti, G., and Mei, F.: Modeling mineral dust emissions from Chinese and Mongolian deserts, *Global and Planetary Change*, 52, 121–141, 2006.
- Lee, E.-H., Munkhtsetseg, E., Kim, S.-B., Ha, J.-C., Lee, S.-S., and Chun, Y.: Numerical simulation and evaluation of Asian dust events observed in Mongolia in spring 2011, *Asia-Pacific Journal of Atmospheric Sciences*, 49, 111–120, 2013.
- Li, F.-R., Zhao, W.-Z., Liu, J.-L., and Huang, Z.-G.: Degraded vegetation and wind erosion influence soil carbon, nitrogen and phosphorus accumulation in sandy grasslands, *Plant and Soil*, 317, 79, 2009.
- Liu, S. and Wang, T.: Aeolian processes and landscape change under human disturbances on the Sonid grassland of inner Mongolian Plateau, northern China, *Environmental earth sciences*, 71, 2399–2407, 2014.

- Macpherson, T., Nickling, W. G., Gillies, J. A., and Etyemezian, V.: Dust emissions from undisturbed and disturbed supply-limited desert surfaces, *Journal of Geophysical Research: Earth Surface*, 113, 2008.
- Mandakh, N., Dash, D., and Khaulenbek, A.: Present status of desertification in Mongolia, *Geocological issues in Mongolia*, 6, 63–73, 5 2007.
- Marquardt, D. W.: An algorithm for least-squares estimation of nonlinear parameters, *Journal of the society for Industrial and Applied Mathematics*, 11, 431–441, 1963.
- Marticorena, B. and Bergametti, G.: Modeling the atmospheric dust cycle: 1. Design of a soil-derived dust emission scheme, *Journal of Geophysical Research: Atmospheres*, 100, 16 415–16 430, 1995.
- 10 Milchunas, D., Sala, O., and Lauenroth, W.: A generalized model of the effects of grazing by large herbivores on grassland community structure, *The American Naturalist*, 132, 87–106, 1988.
- Moré, J. J.: The Levenberg-Marquardt algorithm: implementation and theory, in: *Numerical analysis*, pp. 105–116, Springer, 1978.
- Munkhtsetseg, E., Shinoda, M., Gillies, J. A., Kimura, R., King, J., and Nikolich, G.: Relationships between soil moisture and dust emissions in a bare sandy soil of Mongolia, *Particuology*, 28, 131–137, 2016.
- 15 Nandintsetseg, B. and Shinoda, M.: Land surface memory effects on dust emission in a Mongolian temperate grassland, *Journal of Geophysical Research: Biogeosciences*, 120, 414–427, 2015.
- Natsagdorj, L. and Dulamsuren, J.: Some aspects of assessment of the dzud phenomena, *Papers in Meteorology and Hydrology*, 23, 3–18, 2001.
- Neuman, C. M., Boulton, J. W., and Sanderson, S.: Wind tunnel simulation of environmental controls on fugitive dust emissions from mine 20 tailings, *Atmospheric Environment*, 43, 520–529, 2009.
- Nickling, W. and Gillies, J.: Dust emission and transport in Mali, West Africa, *Sedimentology*, 40, 859–868, 1993.
- Park, S.-U. and In, H.-J.: Parameterization of dust emission for the simulation of the yellow sand (Asian dust) event observed in March 2002 in Korea, *Journal of Geophysical Research: Atmospheres*, 108, 2003.
- Park, S.-U., Choe, A., Lee, E.-H., Park, M.-S., and Song, X.: The Asian dust aerosol model 2 (ADAM2) with the use of normalized difference 25 vegetation index (NDVI) obtained from the Spot4/vegetation data, *Theoretical and Applied Climatology*, 101, 191–208, 2010.
- Peters, D. P.: Plant species dominance at a grassland–shrubland ecotone: an individual-based gap dynamics model of herbaceous and woody species, *Ecological Modelling*, 152, 5–32, 2002.
- Plachter, H. and Hampicke, U.: *Large-scale livestock grazing: a management tool for nature conservation*, Springer Science & Business Media, 2010.
- 30 Pogue, D. W. and Schnell, G. D.: Effects of agriculture on habitat complexity in a prairie-forest ecotone in the Southern Great Plains of North America, *Agriculture, ecosystems & environment*, 87, 287–298, 2001.
- Proulx, M. and Mazumder, A.: Reversal of grazing impact on plant species richness in nutrient-poor vs. nutrient-rich ecosystems, *Ecology*, 79, 2581–2592, 1998.
- Razali, N. M., Wah, Y. B., et al.: Power comparisons of shapiro-wilk, kolmogorov-smirnov, lilliefors and anderson-darling tests, *Journal of 35 statistical modeling and analytics*, 2, 21–33, 2011.
- Reynolds, R. L., Yount, J. C., Reheis, M., Goldstein, H., Chavez, P., Fulton, R., Whitney, J., Fuller, C., and Forester, R. M.: Dust emission from wet and dry playas in the Mojave Desert, USA, *Earth Surface Processes and Landforms*, 32, 1811–1827, 2007.
- Saizen, I., Maekawa, A., and Yamamura, N.: Spatial analysis of time-series changes in livestock distribution by detection of local spatial associations in Mongolia, *Applied Geography*, 30, 639–649, 2010.

- Sasaki, T., Okayasu, T., Jamsran, U., and Takeuchi, K.: Threshold changes in vegetation along a grazing gradient in Mongolian rangelands, *Journal of Ecology*, 96, 145–154, 2008.
- Shabb, D., Chitnis, N., Baljinnyam, Z., Saagii, S., and Zinsstag, J.: A mathematical model of the dynamics of Mongolian livestock populations, *Livestock science*, 157, 280–288, 2013.
- 5 Shao, Y.: *Physics and modelling of wind erosion (atmospheric and oceanographic sciences library)*, 2000.
- Shao, Y.: A model for mineral dust emission, *Journal of Geophysical Research: Atmospheres*, 106, 20 239–20 254, 2001.
- Shao, Y.: *Physics and modelling of wind erosion*, vol. 37, Springer Science & Business Media, 2008.
- Shinoda, M., Kimura, R., Mikami, M., Tsubo, M., Nishihara, E., Ishizuka, M., Yamada, Y., Munkhtsetseg, E., Jugder, D., and Kurosaki, Y.:  
10 Characteristics of dust emission in the Mongolian steppe during the 2008 DUVEX intensive observational period, *Sola*, 6, 9–12, 2010a.
- Shinoda, M., Nachinshonhor, G., and Nemoto, M.: Impact of drought on vegetation dynamics of the Mongolian steppe: a field experiment, *Journal of Arid Environments*, 74, 63–69, 2010b.
- Shinoda, M., Gillies, J., Mikami, M., and Shao, Y.: Temperate grasslands as a dust source: Knowledge, uncertainties, and challenges, *Aeolian Research*, 3, 271–293, 2011.
- 15 Steffens, M., Kölbl, A., Totsche, K. U., and Kögel-Knabner, I.: Grazing effects on soil chemical and physical properties in a semiarid steppe of Inner Mongolia (PR China), *Geoderma*, 143, 63–72, 2008.
- Stumpp, M., Wesche, K., Retzer, V., and Miehe, G.: Impact of grazing livestock and distance from water source on soil fertility in southern Mongolia, *Mountain Research and Development*, 25, 244–251, 2005.
- Suttie, J., Reynolds, S., and Batello, C.: *Grasslands of the world (Plant Production and Protection Series No. 34)*, Food and Agriculture  
20 Organization of the United Nations (FAO), Rome, 2005.
- Taylor, J.: *Introduction to error analysis, the study of uncertainties in physical measurements*, 1997.
- Tegen, I., Werner, M., Harrison, S., and Kohfeld, K.: Relative importance of climate and land use in determining present and future global soil dust emission, *Geophysical Research Letters*, 31, 2004.
- Tollner, E., Calvert, G., and Langdale, G.: Animal trampling effects on soil physical properties of two Southeastern US ultisols, *Agriculture, ecosystems & environment*, 33, 75–87, 1990.
- 25 Uno, I., Wang, Z., Chiba, M., Chun, Y., Gong, S., Hara, Y., Jung, E., Lee, S.-S., Liu, M., Mikami, M., et al.: Dust model intercomparison (DMIP) study over Asia: Overview, *Journal of Geophysical Research: Atmospheres*, 111, 2006.
- Wang, J., Brown, D. G., and Chen, J.: Drivers of the dynamics in net primary productivity across ecological zones on the Mongolian Plateau, *Landscape ecology*, 28, 725–739, 2013.
- 30 Wang, X., Huang, J., Ji, M., and Higuchi, K.: Variability of East Asia dust events and their long-term trend, *Atmospheric Environment*, 42, 3156–3165, 2008.
- Warren, S., Thurow, T., Blackburn, W., and Garza, N.: The influence of livestock trampling under intensive rotation grazing on soil hydrologic characteristics, *Journal of range management*, pp. 491–495, 1986.
- Xu, Y.: *Dust emissions from undisturbed and disturbed soils: effects of off-road military vehicles*, Ph.D. thesis, Kansas State University,  
35 2014.
- Yoshihara, Y., Okuro, T., Buuveibaatar, B., Undarmaa, J., and Takeuchi, K.: Complementary effects of disturbance by livestock and marmots on the spatial heterogeneity of vegetation and soil in a Mongolian steppe ecosystem, *Agriculture, ecosystems & environment*, 135, 155–159, 2010.

- Zhang, J., Teng, Z., Huang, N., Guo, L., and Shao, Y.: Surface renewal as a significant mechanism for dust emission, *Atmospheric Chemistry and Physics*, 16, 15 517–15 528, 2016.
- Zhang, Y., Wang, H., Wang, X., Yang, W., and Zhang, D.: The microstructure of microbiotic crust and its influence on wind erosion for a sandy soil surface in the Gurbantunggut Desert of Northwestern China, *Geoderma*, 132, 441–449, 2006.
